# Supplementary material for: Two mitogen-activated protein kinase kinases, MKK1 and MEK2, are involved in wounding- and specialist lepidopteran herbivore Manduca sexta-induced responses in Nicotiana attenuata
Source: PubMed Central journal article supplement — J Exp Bot. 2011 May 24;62(12):4355–65. doi: 10.1093/jxb/err162 (PMC3153688; doi:10.1093/jxb/err162), 2011-05-24
Supplement: supp_err162_00058453-file001.pdf [file supp_err162_00058453-file001.pdf]

**Two mitogen-activated protein kinase kinases, MKK1 and MEK2, are involved in wounding- and specialist lepidopteran herbivore *Manduca sexta*-induced responses in *Nicotiana attenuata***

Maria Heinrich, Ian T. Baldwin, and Jianqiang Wu

**Supplementary material**

**Supplementary Table S1** Primers used to clone the open reading frames of *NaMKK1* and *NaMEK2* in *N. attenuata*

| <b>Primers</b> | <b>Sequences (5'-3')</b> |
|----------------|--------------------------|
| NaMKK1 ORF 1   | ACCCGACCCTGTTTACCCATC    |
| NaMKK1 ORF 2   | AATTAAGCTTGCACGAACTGTC   |
| NaMEK2 ORF 1   | CAATCAATCAATCATGCGACC    |
| NaMEK2 ORF 2   | CCCATCATCCCCATTAATAGA    |

**Supplementary Table S2** Primers used to clone partial *NaMKK1* and *NaMEK2* into pTV00 to obtain VIGS constructs

| <b>Primers</b>      | <b>Sequences (5'-3')</b>                       |
|---------------------|------------------------------------------------|
| NaMKK1-VIGS-BamHI   | CTGAG <b><u>GGATCC</u></b> GCAGCGGATATTTGGAGT  |
| NaMKK1-VIGS-HindIII | GTCAA <b><u>AGCTT</u></b> CTGTAAACAACACTCGATAA |
| NaMEK2-VIGS-HindIII | GTCAA <b><u>AGCTT</u></b> CCTCGTGGTTACCGTAGA   |
| NaMEK2-VIGS-ClaI    | ATCG <b><u>ATCGAT</u></b> CTCCGCCCTTCTTCCT     |

Note: bold and underlined nucleotides are restriction sites for cloning into pTV00 vector

**Supplementary Table S3** GenBank accession numbers or Swiss-Prot accession numbers of the MAPKKs for phylogenetic analysis

| Gene names | Accession numbers | Gene names | Accession numbers |
|------------|-------------------|------------|-------------------|
| NaMEK2     | HQ023234          | OsMKK1     | EF5296231         |
| NaMKK1     | HQ023235          | OsMEK2     | Os06g05520        |
| AtMKK1     | At4g26070         | OsMKK3     | Os06g27890        |
| AtMKK2     | At4g29810         | OsMKK4     | Os02g54600        |
| AtMKK3     | At5g40440         | OsMKK5     | Os06g09180        |
| AtMKK4     | At1g51660         | OsMEK1     | Q5QN75.1          |
| AtMKK5     | At3g21220         | NtMEK2     | BAE97401          |
| AtMKK6     | At5g56580         | NtSIPKK    | AAF67262          |
| AtMKK7     | At1g18350         | NtNPK2     | BAA06731          |
| AtMKK8     | At3g06230         | NbMKK1     | AB243987          |
| AtMKK9     | At1g73500         | NbMEK2     | AB360636          |
| AtMKK10    | At1g32320         |            |                   |

Note: the species of origin of the MAPKKs are indicated by the two letters in front of the protein names; At, *Arabidopsis thaliana*; Na, *Nicotiana attenuata*; Nb, *Nicotiana benthamiana*; Nt, *Nicotiana tabacum*; Os, *Oryza sativa*.

**Supplementary Table S4** Primers used for qPCR

| <b>Primers</b> | <b>Sequences (5'-3')</b>      |
|----------------|-------------------------------|
| NaMKK1-Forward | ATC CCG AGA TTC GCC GTC AA    |
| NaMKK1-Reverse | TCG AGT GTG CCG GAG TTC AT    |
| NaMEK2-Forward | GAG AGT GCT GGC ACA AAC TAT   |
| NaMEK2-Reverse | TCC ATA TAT CTC CAG CAT ACC C |
| NaEF1a-Forward | CCCACTTCCCACATTGCTG           |
| NaEF1a-Reverse | CGCATGTCCCTCACAGCAA           |

```

1 -----MALVRERRQLNLRLPLLPEPSER-RPR- ---FPLLPILP-----PSSI C NbMKK1
1 MRPLQPPPPAAAAATT-SSSTTASMPPPPSRNRRRRRTDLTLPLLPQRDPALAVPLLPLLPIL NtMEK2
1 MRPLQPPPPAAAAATTTSSSTTASMPPPPSRNRRRRRTDLTLPLLPQRDPALAVPLLPLLPIL NaMEK2
1 -----MALVRERRQLNLRLPLLPEPSER-RPR- ---FPLLPILP-----PSSI S NaMKK1

37 TTNSTANTATTTASTTTIS SELEKLKVLCHCNCGTVYEVRHKRTSSAIYALKVVHCDSDP NbMKK1
60 SAPSSSSSSSSSSPLPILPLNFSELERINRICSCACGTVYKVLHRPTIGRLYALKVIYCNHED NtMEK2
61 SAPSSSSSSSSSSPLPILPLNFSELERINRICSCACGTVYKVLHRPTIGRLYALKVIYCNHED NaMEK2
37 TTNSAAANTTTTTAPTTTIS SELEKLKVLCHCNCGTVYKVRHKRTSSAIYALKVVHCDSDP NaMKK1

97 EIRRCLREISLLRRTDSPYVIKCFGVIDMPCGDIGILMEYMNVCTLESLLKSQATFSEL NbMKK1
120 SVRLCMCREIELLRDVDNPNVRCHDMFDHNC-EIQVLLEFMDKCSLEGIHIPK----ES NtMEK2
121 SVRLCMCREIELLRDVDNPNVRCHDMFDHNC-EIQVLLEFMDKCSLEGIHIPK----ES NaMEK2
97 EIRRCVLREISLLRRTDSPYIIKCFGVIDMPCGDIGILMEYMNSCTLESLLKSHATFTEL NaMKK1

157 SLAKIAKCVLSLGLDYLLNHKIIHRDLKPSNLLVNREMEVKIADFGVSKIMCRTLDPCNSY NbMKK1
175 ALSDLTRCVLSLGLYLLRRKIVHRDIKPSNLLINSRREVKIADFGSRVLACTLDPCNSS NtMEK2
176 ALSDLTRCVLSLGLYLLRRKIVHRDIKPSNLLINSRREVKIADFGSRVLACTLDPCNSS NaMEK2
157 SLAKIAKCVLSLGLDYLLNHKIIHRDLKPSNLLVNREMEVKIADFGVSKIMCRTLDPCNSY NaMKK1

217 VGTCAYMSPERFDPGTYGVNYNGYAADIMSLGLTLMELYICHFFPLPPCQRPDWATLMCA NbMKK1
235 VGTIAYMSPERINTDLNHGQYDGYAGDIMSLGVSILEFYLGRFFPS-VCRSGDWASLMCA NtMEK2
236 VGTIAYMSPERINTDLNHGQYDGYAGDIMSLGVSILEFYLGRFFPS-VCRSGDWASLMCA NaMEK2
217 VGTCAYMSPERFDPGTYGVNYNGYAADIMSLGLTLMELYICHFFPLPPCQRPDWATLMCA NaMKK1

277 ICFGEPPSLPEGTSVNFFRDFIECCLCKESSKRVSAQCLLQHPFILSNLK NbMKK1
294 ICMSQPEAPANASREFFRDFIACCLCQRDPARRVTAVQLLRHPFITQNSPAATTT-GNMMP NtMEK2
295 ICMSQPEAPANASREFFRDFIACCLCQRDPARRVTAVQLLRHPFITQNSPATTTTTGNMMP NaMEK2
277 ICFGEPPSLPEGTSGNFKDFIECCLCKESSKRVSAQCLLQHPFILSNLK. NaMKK1

325 LPNQVHQPAHQLLPPPHFSS NbMKK1
353 LPNQVHQPAHQLLPPPHFSS NtMEK2
355 LPNQVHQPAHQLLPPPHFSS NaMEK2
326 LPNQVHQPAHQLLPPPHFSS NaMKK1

```

**Supplementary Fig. S1** Alignment of the protein sequences of *N. attenuata* NaMKK1 and NaMEK2 with *N. benthamiana* NbMKK1 and *N. tabacum* NtMEK2.

Protein sequences of NaMKK1, NaMEK2, NbMKK1, and NtMEK2 were aligned using ClustalW algorithm. Shaded amino acid sequences represent residues that match the consensus sequence. The conserved motif of plant MAPKKs [S/TxxxxxS/T] are highlighted with green frames (two consecutive motives).

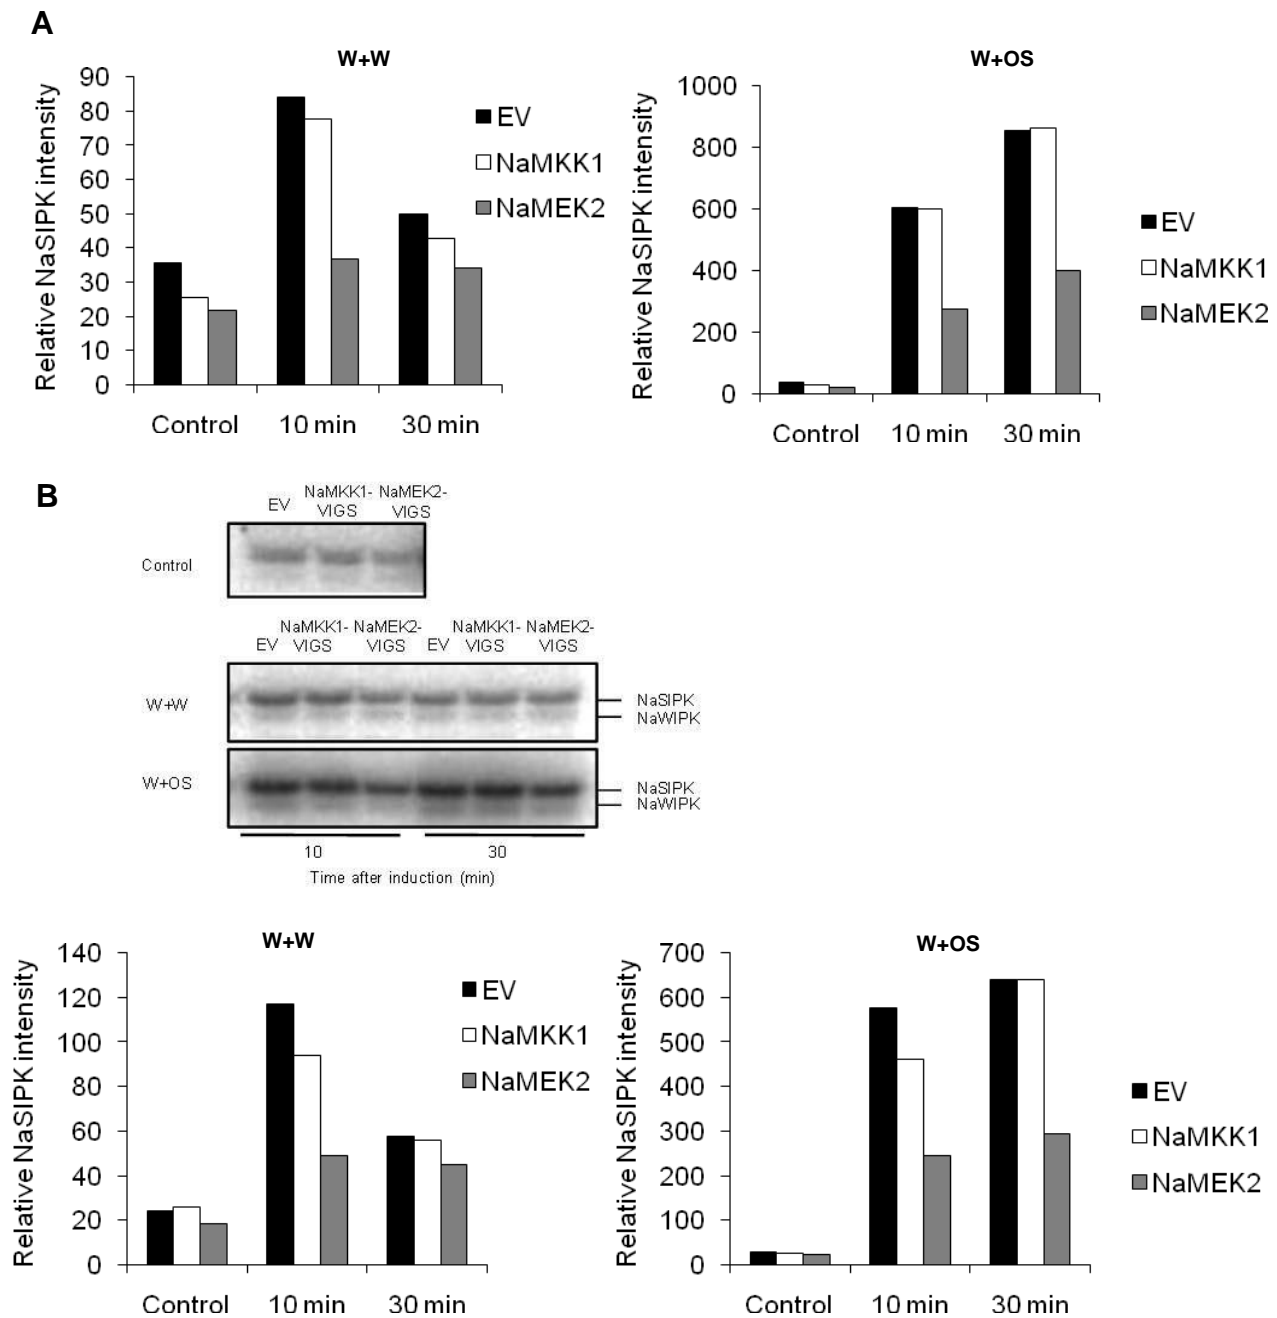

**Supplementary Fig. S2** Wounding- and simulated herbivory-induced MAPK activity in EV, NaMKK1-VIGS, and NaMEK2-VIGS plants.

*N. attenuata* plants were wounded with a fabric pattern wheel and 15  $\mu$ l of water or *M. sexta* oral secretions (OS) were applied immediately to wounds (W+W and W+OS respectively); untreated plants served as controls. In-gel kinase activity assays were performed to determine the activity of NaSIPK and NaWIPK. (A) The band intensities of NaSIPK in Fig. 3B. (B) In-gel MAPK activity assay (upper panel) and NaSIPK band intensities (lower panel) obtained from an independently repeated experiment.

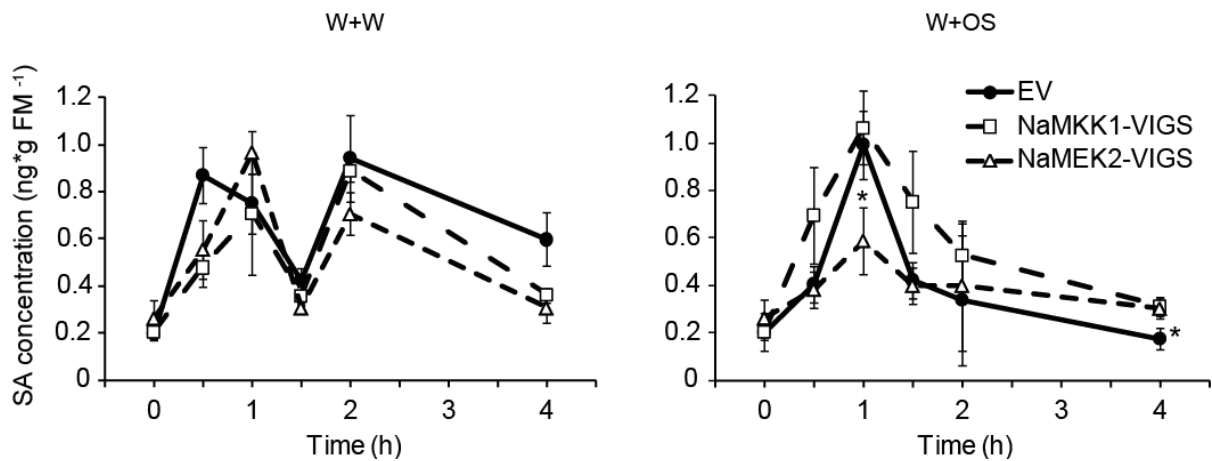

**Supplementary Fig. S3** Salicylic acid accumulation in EV, NaMKK1-VIGS, and NaMEK2-VIGS plants after W+W and W+OS treatment.

Rosette leaves of EV, MKK1-VIGS, and MEK2-VIGS plants were wounded with a fabric pattern wheel and 15µl water or *M. sexta* oral secretions (OS) were applied to wounds. Samples were harvested after indicated times and SA levels were analyzed with LC/MS method. Asterisks indicate significant differences between EV and NaMKK1-VIGS or NaMEK2-VIGS plants (*t*-test; \*,  $P < 0.05$ ;  $N = 5$ ).
